# Supplementary material for: Continuous Secretion of Human Epidermal Growth Factor Based on Escherichia coli Biofilm
Source: MDPI journal article supplement (doi:10.3390/fermentation10040202), 2024-04-09
Supplement: s1 [file s1]

# Continuous Secretion of Human Epidermal Growth Factor Based on *Escherichia coli* Biofilm

Chong Zhang <sup>1</sup>, Jinglin Liao <sup>1</sup>, Yuancong Li <sup>1</sup>, Shuli Liu <sup>2</sup>, Mengting Li <sup>1</sup>, Di Zhang <sup>1</sup>,  
Zhenyu Wang <sup>1,\*</sup>, Dong Liu <sup>1,\*</sup> and Hanjie Ying <sup>1</sup>

<sup>1</sup> College of Biotechnology and Pharmaceutical Engineering,  
Nanjing Tech University, Nanjing 211816, China; zhangc256@163.com (C.Z.);  
202261218204@njtech.edu.cn (J.L.); 15239970910@163.com (Y.L.);  
lmtlmt@njtech.edu.cn (M.L.); zd@njtech.edu.cn (D.Z.);  
yinghanjie@njtech.edu.cn (H.Y.)

<sup>2</sup> School of Chemical Engineering and Energy, Zhengzhou University,  
Zhengzhou 450001, China; 18737596190@163.com

\* Correspondence: zhenyuwang@njtech.edu.cn (Z.W.);  
liudong@njtech.edu.cn (D.L.); Tel.: +86-25-58139992 (D.L.);  
Fax: +86-25-58139389 (D.L.)

**Table S1.** Primers used in this study

| Primer            | Sequence Number | Sequence                                                          |
|-------------------|-----------------|-------------------------------------------------------------------|
| <i>arpA</i> -sg-F | NO.1            | gtcctaggtataataactagtagttttatcattagttacattgttttagag<br>ctagaaatag |
| <i>yfbL</i> -sg-F | NO.2            | gtcctaggtataataactagttctctgaccacctgaattatgttttaga<br>gctagaaatag  |
| <i>yddE</i> -sg-F | NO.3            | gtcctaggtataataactagtagagcgctgatccacttcgtttag<br>agctagaaatag     |
| <i>yjcF</i> -sg-F | NO.4            | gtcctaggtataataactagtgaaatggcaattgcttaaatgttttag<br>agctagaaatag  |
| <i>yjjM</i> -sg-F | NO.5            | gtcctaggtataataactagttagccgatgacgttcgagcagtttta<br>gagctagaaatag  |
| sg-R              | NO.6            | actagtattatacctaggactgagctagctgtcaaggatc                          |
| <i>arpA</i> -up-F | NO.7            | taaatccaaacaggcgtgcatggtag                                        |
| <i>arpA</i> -up-R | NO.8            | gccttcaaccagtcagctccttcgggtgggcggaatatta<br>aacactattctctgatgg    |
| <i>yfbL</i> -up-F | NO.9            | aacactcataactcattataaataatg                                       |
| <i>yfbL</i> -up-R | NO.10           | gccttcaaccagtcagctccttcgggtgggcgccatggg<br>gcattcatagaataaacag    |
| <i>yddE</i> -up-F | NO.11           | taccgtggatgagttagcgtggtg                                          |
| <i>yddE</i> -up-R | NO.12           | gccttcaaccagtcagctccttcgggtgggcgccgctat<br>cagttaacagattggctg     |
| <i>yjcF</i> -up-F | NO.13           | tgctgaactttaccacctgcgcgccacg                                      |
| <i>yjcF</i> -up-R | NO.14           | gccttcaaccagtcagctccttcgggtgggcggatgttta<br>atatccgtctctatcgtg    |
| <i>yjjM</i> -up-F | NO.15           | aattgtttacgtaattgtgcattacg                                        |
| <i>yjjM</i> -up-R | NO.16           | caaccagtcagctccttcgggtgggcgctggcaatagct<br>ttcgatgttctcg          |

---

|                    |       |                                                                |
|--------------------|-------|----------------------------------------------------------------|
| <i>hEGF-arpA-F</i> | NO.17 | ccatcagagaatagtgttaattccgcccaccggaagga<br>gctgactgggtgaaggc    |
| <i>hEGF-arpA-R</i> | NO.18 | ggctaagaataaagaacacaactgaaggatgtacggcg<br>cgtccattcgccaatccgg  |
| <i>hEGF-yfbL-F</i> | NO.19 | ctgtttattctatgaatgccccatggcgcccaccggaagga<br>gctgactgggtgaaggc |
| <i>hEGF-yfbL-R</i> | NO.20 | cgataaaagcgggtgcagtaatcattacggggcgctccatt<br>cgccaatccgg       |
| <i>hEGF-yddE-F</i> | NO.21 | cagccaatctgttaactgatagcggcgcccaccggaaggagct<br>gactgggtgaaggc  |
| <i>hEGF-yddE-R</i> | NO.22 | cgatattctgccgggttgccgatccaggtcggggcacgtccc<br>attcgccaatccgg   |
| <i>hEGF-yjcF-F</i> | NO.23 | cacgatagagacggatattaacatccgcccaccggaaggagc<br>tgactgggtgaaggc  |
| <i>hEGF-yjcF-R</i> | NO.24 | cgaaatggttatatgtaccggctctaatatggggcgcgctc<br>ccattcgccaatccgg  |
| <i>hEGF-yjjM-F</i> | NO.25 | cgagaacatgcgaaagctattgccgacgccaccgga<br>aggagctgactgggtg       |
| <i>hEGF-yjjM-R</i> | NO.26 | gcactttctaacctgcctgatcatgatcgggcgcgctccc<br>attcgccaatccgg     |
| <i>arpA-dn-F</i>   | NO.27 | ccggattggcgaatgggacgcgcccgtacatcctcagt<br>tgtgttctttattcttagcc |
| <i>arpA-dn-R</i>   | NO.28 | acacttactcaaaccattgccccaatatttg                                |
| <i>yfbL-dn-F</i>   | NO.29 | ccggattggcgaatgggacgcgccccgtaatgattact<br>gacaccgttttatcg      |
| <i>yfbL-dn-R</i>   | NO.30 | ttccaggatcaatcccaggaagccatc                                    |
| <i>yddE-dn-F</i>   | NO.31 | ccggattggcgaatgggacgcgcccgcgacctggatc                          |

---

---

|                        |       |                                                            |
|------------------------|-------|------------------------------------------------------------|
|                        |       | ggcaaaccggcagaatatcg                                       |
| <i>yddE</i> -dn-R      | NO.32 | tgatagttctccagtcacaggagaacg                                |
| <i>yjcF</i> -dn-F      | NO.33 | ccggattggcgaatgggacgcgcccgcattagagc<br>cgtacatataaccatttcg |
| <i>yjcF</i> -dn-R      | NO.34 | ttatccaattcgaattttgcaggttc                                 |
| <i>yjiM</i> -dn-F      | NO.35 | ccggattggcgaatgggacgcgcccgcattatcagg<br>caggttgagaaagtgc   |
| <i>yjiM</i> -dn-R      | NO.36 | ttgatgatatggcgcggggtcatatcc                                |
| pET28a-F               | NO.37 | gcagcagccatcatcatcatc                                      |
| pET28a-R               | NO.38 | tctccttctaaagttaaacaaa                                     |
| pBbE1a-F               | NO.39 | ccaggcatcaaataaacgaaag                                     |
| pBbE1a-R               | NO.40 | atgtatatctccttctaaagatctttgaattc                           |
| pET28a- <i>dgcC</i> -F | NO.41 | ttgtttaactttaagaaggagaatgtccaaaaataatga<br>atgatgaaaact    |
| pET28a- <i>dgcC</i> -R | NO.42 | gatgatgatgatggctgctgctcaggccgccacttcggtg                   |
| pET28a- <i>csgD</i> -F | NO.43 | ttgtttaactttaagaaggagaatgtttaatgaagtccatag<br>tattcatggtc  |
| pET28a- <i>csgD</i> -R | NO.44 | gatgatgatgatggctgctgcttatcgctgaggttatcg                    |
| pET28a- <i>bcsA</i> -F | NO.45 | ttgtttaactttaagaaggagaatgagtatcctgacccggt                  |
| pET28a- <i>bcsA</i> -R | NO.46 | gatgatgatgatggctgctgctcattgtgagccaaagcc                    |
| pET28a- <i>bcsB</i> -F | NO.47 | ttgtttaactttaagaaggagaatgaaaagaaactattct<br>gga            |
| pET28a- <i>bcsB</i> -R | NO.48 | atgatgatgatggctgctgcttactcgttatccgggttaa                   |

---

|                        |       |                                                         |
|------------------------|-------|---------------------------------------------------------|
| pBbE1a- <i>bcsB</i> -F | NO.49 | agatctttaagaaggagatatatatgaaaagaaaacta<br>ttctggattgtgc |
| pBbE1a- <i>bcsB</i> -R | NO.50 | cttcgttttatttgatgcctgggtactcgttatccgggtaag<br>ac        |

For genome-integrated expression of *hEGF*, the N20 sequence of sgRNA in pTarget was redesigned to target specific gene locus using primers NO.1 to 6 in Table S1. Primers NO.7 to 16 in Table S1 were used to amplify the upstream homologues of the target locus using *E. coli* BL21(DE3) genome as template, and primers NO.17 to 26 in Table S1 were used to amplify the target gene *hEGF* using plasmid pET30a-PelB-*hEGF* as template, and primers NO.27 to 36 in Table S1 were used to amplify the downstream homologues of the target locus using *E. coli* BL21(DE3) genome as template. These fragments were ligated by overlap PCR. For expression of biofilm-related genes, plasmid fragments were amplified using primers NO.37 to 40 listed in Table S1, and biofilm genes *dgcC*, *csgD*, *bcsA* and *bcsB* were amplified from the genomic DNA of *E. coli* MG1655 using primers NO.41 to 50 listed in Table S1, which were linked by overlap PCR.

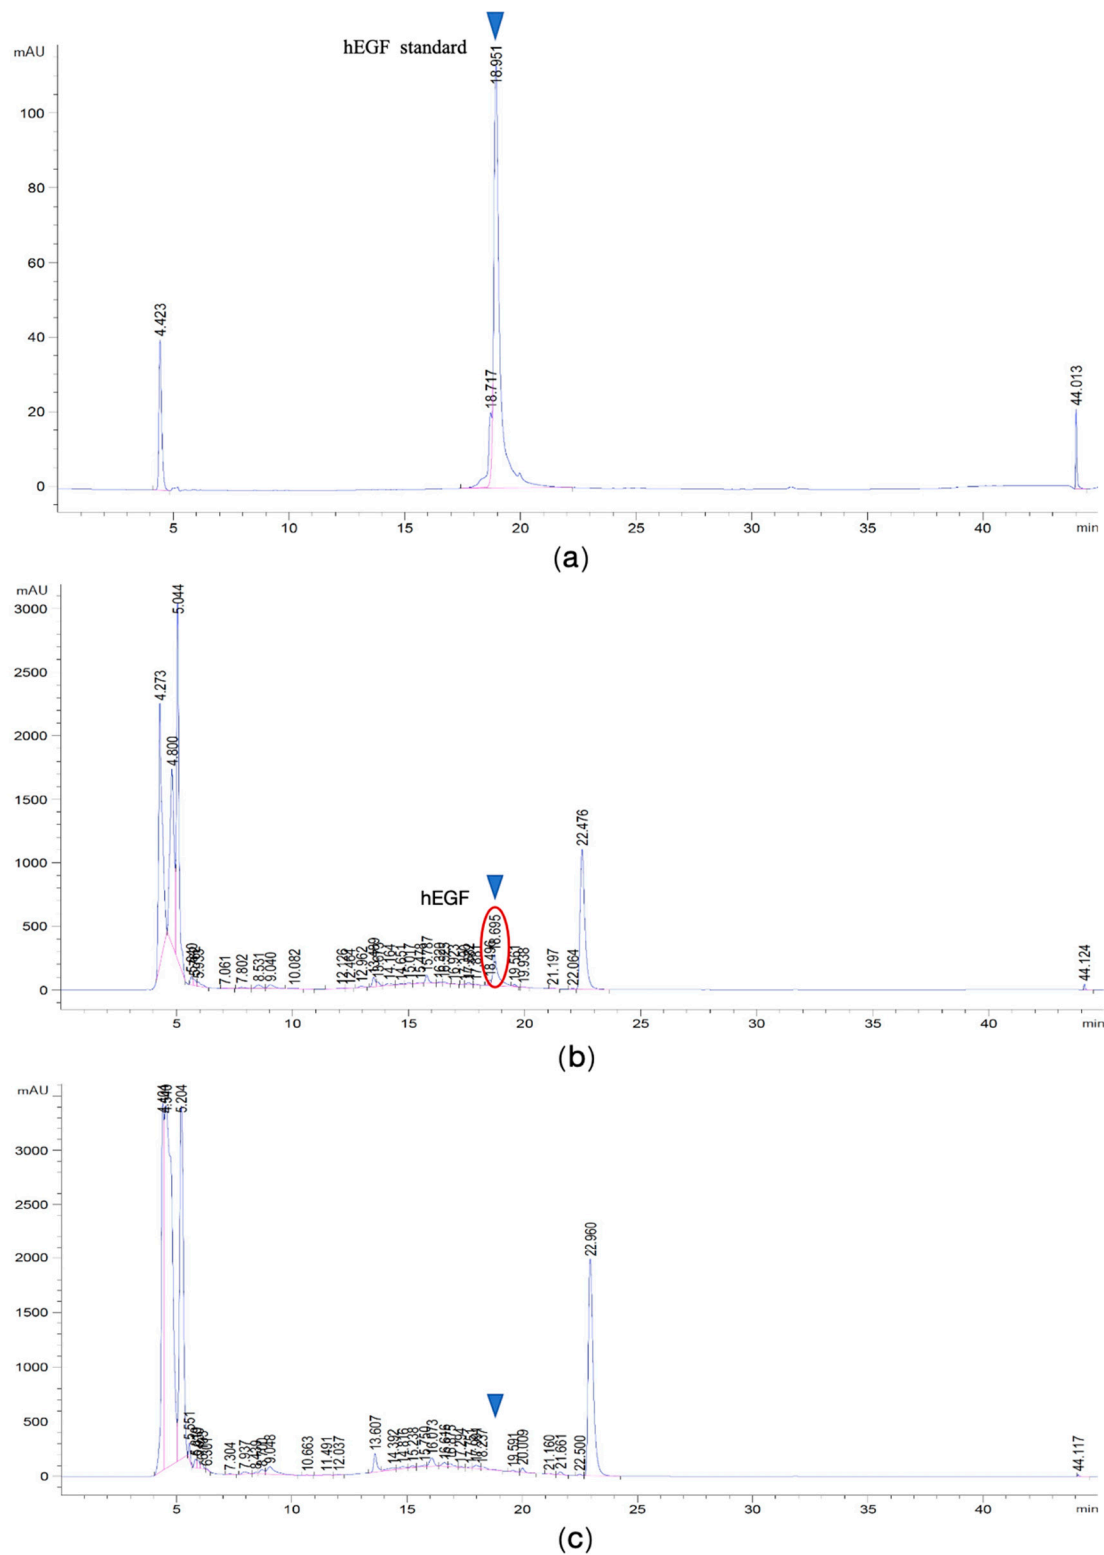

**Figure S1** Elution profile. (a) hEGF standard (25 mg/L); (b) BL21-*hEGF*-C5 (37 mg/L); (c) BL21 (DE3).
